# Supplementary material for: Lanthanide complexes with 3,4,5-triethoxybenzoic acid and 1,10-phenanthroline: synthesis, crystal structures, thermal decomposition mechanism and phase transformation kinetics
Source: Royal Society of Chemistry journal article supplement (doi:10.1039/c4ra12063a), 2014-12-10
Supplement: c4ra12063a1.pdf [file c4ra12063a1.pdf]

**Lanthanide Complexes with 3, 4, 5-Triethoxybenzoic acid and 1,10-phenanthroline: Synthesis, Crystal structures, Thermal decomposition mechanism and Phase transformation kinetics**

Xiao-Xia Qi<sup>1,2</sup>, Ning Ren<sup>3</sup>, Su-Ling Xu<sup>4</sup>, Jian-Jun Zhang<sup>1,2\*</sup>, Guang-Cai Zong<sup>1,2</sup>, Jie Gao<sup>1,2</sup>, Li-Na Geng<sup>2</sup>, Shu-Ping Wang<sup>2</sup>, Shi-Kao Shi<sup>2</sup>

<sup>1</sup>Testing and Analysis Center, Hebei Normal University, Shijiazhuang 050024 P.R. China.

<sup>2</sup>College of Chemistry & Material Science, Hebei Normal University, Shijiazhuang 050024 P.R. China.

<sup>3</sup>College of Chemical engineering & Material, Handan College, Handan 056005 P. R. China.

<sup>4</sup>Hebei Super Vision & Inspection Institute of Boiler & Pressure Vessel, Shijiazhuang 050061 P. R. China

\*E-mail address: jjzhang6@126.com

**Table S1a** Experimental molar heat capacities of complexes 1-2.

| Complex 1 |                                                          | Complex 2                                                |        | Complex 1                                                |                                                          | Complex 2                                                |                                                          |
|-----------|----------------------------------------------------------|----------------------------------------------------------|--------|----------------------------------------------------------|----------------------------------------------------------|----------------------------------------------------------|----------------------------------------------------------|
| T/K       | $C_{p,m}/\text{J}\cdot\text{mol}^{-1}\cdot\text{K}^{-1}$ | $C_{p,m}/\text{J}\cdot\text{mol}^{-1}\cdot\text{K}^{-1}$ | T/K    | $C_{p,m}/\text{J}\cdot\text{mol}^{-1}\cdot\text{K}^{-1}$ | $C_{p,m}/\text{J}\cdot\text{mol}^{-1}\cdot\text{K}^{-1}$ | $C_{p,m}/\text{J}\cdot\text{mol}^{-1}\cdot\text{K}^{-1}$ | $C_{p,m}/\text{J}\cdot\text{mol}^{-1}\cdot\text{K}^{-1}$ |
|           | 1                                                        | 1                                                        |        |                                                          |                                                          |                                                          |                                                          |
| 263.15    | 1721.939                                                 | 2310.871                                                 | 364.65 | 2559.696                                                 | 3326.121                                                 |                                                          |                                                          |
| 266.65    | 1756.439                                                 | 2350.456                                                 | 368.15 | 2587.862                                                 | 3360.933                                                 |                                                          |                                                          |
| 270.15    | 1790.884                                                 | 2389.705                                                 | 371.65 | 2619.712                                                 | 3398.620                                                 |                                                          |                                                          |
| 273.65    | 1825.718                                                 | 2428.176                                                 | 375.15 | 2650.570                                                 | 3440.145                                                 |                                                          |                                                          |
| 277.15    | 1859.765                                                 | 2470.111                                                 | 378.65 | 2688.824                                                 | 3471.887                                                 |                                                          |                                                          |
| 280.65    | 1894.625                                                 | 2510.252                                                 | 382.15 | 2728.319                                                 | 3486.307                                                 |                                                          |                                                          |
| 284.15    | 1929.270                                                 | 2551.031                                                 | 385.65 | 2769.762                                                 | 3499.565                                                 |                                                          |                                                          |
| 287.65    | 1961.321                                                 | 2592.264                                                 | 389.15 | 2798.812                                                 | 3529.956                                                 |                                                          |                                                          |
| 291.15    | 1993.155                                                 | 2632.243                                                 | 392.65 | 2805.194                                                 | 3564.335                                                 |                                                          |                                                          |
| 294.65    | 2024.072                                                 | 2670.498                                                 | 396.15 | 2812.380                                                 | 3600.693                                                 |                                                          |                                                          |
| 298.15    | 2053.150                                                 | 2709.855                                                 | 399.65 | 2823.110                                                 | 3634.613                                                 |                                                          |                                                          |
| 301.65    | 2083.447                                                 | 2745.635                                                 | 403.15 | 2838.162                                                 | 3672.571                                                 |                                                          |                                                          |
| 305.15    | 2115.573                                                 | 2785.203                                                 | 406.65 | 2859.083                                                 | 3702.800                                                 |                                                          |                                                          |
| 308.65    | 2150.763                                                 | 2851.476                                                 | 410.15 | 2882.285                                                 | 3736.655                                                 |                                                          |                                                          |
| 312.15    | 2187.285                                                 | 3113.141                                                 | 413.65 | 2907.096                                                 | 3771.418                                                 |                                                          |                                                          |
| 315.65    | 2231.614                                                 | 3554.137                                                 | 417.15 | 2931.437                                                 | 3806.982                                                 |                                                          |                                                          |
| 319.15    | 2287.401                                                 | 3333.120                                                 | 420.65 | 2957.197                                                 | 3844.291                                                 |                                                          |                                                          |
| 322.65    | 2525.746                                                 | 3042.193                                                 | 424.15 | 2982.978                                                 | 3880.097                                                 |                                                          |                                                          |
| 326.15    | 4379.366                                                 | 2986.146                                                 | 427.65 | 3012.164                                                 | 3919.314                                                 |                                                          |                                                          |
| 329.65    | 2802.778                                                 | 3011.365                                                 | 431.15 | 3041.420                                                 | 3952.391                                                 |                                                          |                                                          |
| 333.15    | 2385.839                                                 | 3049.490                                                 | 434.65 | 3071.835                                                 | 3990.100                                                 |                                                          |                                                          |
| 336.65    | 2365.727                                                 | 3083.507                                                 | 438.15 | 3100.357                                                 | 4028.841                                                 |                                                          |                                                          |
| 340.15    | 2376.015                                                 | 3109.072                                                 | 441.65 | 3129.689                                                 | 4062.929                                                 |                                                          |                                                          |
| 343.65    | 2395.911                                                 | 3137.430                                                 | 445.15 | 3163.703                                                 | 4102.665                                                 |                                                          |                                                          |
| 347.15    | 2419.497                                                 | 3164.054                                                 | 448.65 | 3195.861                                                 | 4136.731                                                 |                                                          |                                                          |
| 350.65    | 2446.373                                                 | 3188.143                                                 | 452.15 | 3229.529                                                 | 4174.251                                                 |                                                          |                                                          |
| 354.15    | 2475.413                                                 | 3212.227                                                 | 455.65 | 3264.023                                                 | 4217.548                                                 |                                                          |                                                          |
| 357.65    | 2503.439                                                 | 3245.887                                                 | 459.15 | 3299.327                                                 | 4255.997                                                 |                                                          |                                                          |
| 361.15    | 2530.267                                                 | 3284.256                                                 | 462.65 | 3337.430                                                 | 4292.042                                                 |                                                          |                                                          |

**Table S1b** Experimental molar heat capacities of complex 3.

| Complex 3 |                                                           | Complex 3 |                                                           | Complex 3 |                                                           |
|-----------|-----------------------------------------------------------|-----------|-----------------------------------------------------------|-----------|-----------------------------------------------------------|
| T/K       | $C_{p,m}/ \text{J}\cdot\text{mol}^{-1}\cdot\text{K}^{-1}$ | T/K       | $C_{p,m}/ \text{J}\cdot\text{mol}^{-1}\cdot\text{K}^{-1}$ | T/K       | $C_{p,m}/ \text{J}\cdot\text{mol}^{-1}\cdot\text{K}^{-1}$ |
| 263.15    | 2066.676                                                  | 333.15    | 2621.097                                                  | 403.15    | 3053.470                                                  |
| 266.65    | 2093.440                                                  | 336.65    | 2644.569                                                  | 406.65    | 3076.679                                                  |
| 270.15    | 2124.594                                                  | 340.15    | 2662.673                                                  | 410.15    | 3098.305                                                  |
| 273.65    | 2152.957                                                  | 343.65    | 2680.085                                                  | 413.65    | 3120.303                                                  |
| 277.15    | 2185.514                                                  | 347.15    | 2695.012                                                  | 417.15    | 3141.700                                                  |
| 280.65    | 2215.019                                                  | 350.65    | 2720.078                                                  | 420.65    | 3162.120                                                  |
| 284.15    | 2247.729                                                  | 354.15    | 2749.501                                                  | 424.15    | 3183.806                                                  |
| 287.65    | 2284.440                                                  | 357.65    | 2770.827                                                  | 427.65    | 3207.944                                                  |
| 291.15    | 2326.923                                                  | 361.15    | 2787.315                                                  | 431.15    | 3228.385                                                  |
| 294.65    | 2387.527                                                  | 364.65    | 2806.162                                                  | 434.65    | 3251.338                                                  |
| 298.15    | 2456.517                                                  | 368.15    | 2828.619                                                  | 438.15    | 3276.781                                                  |
| 301.65    | 2459.154                                                  | 371.65    | 2850.250                                                  | 441.65    | 3298.140                                                  |
| 305.15    | 2435.289                                                  | 375.15    | 2876.534                                                  | 445.15    | 3324.292                                                  |
| 308.65    | 2441.044                                                  | 378.65    | 2897.636                                                  | 448.65    | 3345.645                                                  |
| 312.15    | 2468.179                                                  | 382.15    | 2918.465                                                  | 452.15    | 3369.144                                                  |
| 315.65    | 2496.898                                                  | 385.65    | 2939.447                                                  | 455.65    | 3388.805                                                  |
| 319.15    | 2522.613                                                  | 389.15    | 2960.555                                                  | 459.15    | 3412.741                                                  |
| 322.65    | 2546.888                                                  | 392.65    | 2983.519                                                  | 462.65    | 3430.878                                                  |
| 326.15    | 2572.483                                                  | 396.15    | 3004.741                                                  |           |                                                           |
| 329.65    | 2599.667                                                  | 399.65    | 3026.875                                                  |           |                                                           |

**Table S2a** Smoothed molar heat capacities and thermodynamic functions of complex 1.

| T/K    | $C_{p,m}/\text{JK}^{-1}\text{mol}^{-1}$ | $H_T-H_{298.15\text{K}}/\text{kJmol}^{-1}$ | $S_T-S_{298.15\text{K}}/\text{JKmol}^{-1}$ | $G_T-G_{298.15\text{K}}/\text{kJmol}^{-1}$ |
|--------|-----------------------------------------|--------------------------------------------|--------------------------------------------|--------------------------------------------|
| 263.15 | 1722.14                                 | -66.247                                    | -235.92                                    | -4.165                                     |
| 273.15 | 1820.65                                 | -48.538                                    | -169.88                                    | -2.135                                     |
| 283.15 | 1919.41                                 | -29.837                                    | -102.65                                    | -0.772                                     |
| 293.15 | 2010.37                                 | -10.179                                    | -34.43                                     | -0.086                                     |
| 303.15 | 2097.02                                 | 10.395                                     | 34.57                                      | -0.086                                     |
| 313.15 | 2199.80                                 | 31.856                                     | 104.22                                     | -0.779                                     |
| 318.15 | 2285.09                                 | 2241138.978                                | 7454805.36                                 | -130607.346                                |
| 328.15 | 3689.29                                 | 2241169.936                                | 7454900.95                                 | -205155.811                                |
| 338.15 | 2267.57                                 | 2241195.158                                | 7454976.71                                 | -279705.218                                |
| 338.65 | 2370.02                                 | 425.018                                    | 1381.70                                    | -42.895                                    |
| 348.65 | 2433.71                                 | 448.996                                    | 1451.47                                    | -57.061                                    |
| 358.65 | 2507.22                                 | 473.700                                    | 1521.33                                    | -71.925                                    |
| 368.65 | 2594.85                                 | 499.192                                    | 1591.43                                    | -87.488                                    |
| 378.65 | 2695.08                                 | 525.643                                    | 1662.22                                    | -103.755                                   |
| 388.65 | 2777.91                                 | 553.034                                    | 1733.61                                    | -120.733                                   |
| 398.65 | 2830.41                                 | 581.097                                    | 1804.90                                    | -138.426                                   |
| 408.65 | 2873.27                                 | 609.610                                    | 1875.54                                    | -156.828                                   |
| 418.65 | 2935.57                                 | 638.631                                    | 1945.69                                    | -175.934                                   |
| 428.65 | 3021.44                                 | 668.404                                    | 2015.97                                    | -195.742                                   |
| 438.65 | 3109.06                                 | 699.065                                    | 2086.67                                    | -216.254                                   |
| 448.65 | 3191.61                                 | 730.563                                    | 2157.67                                    | -237.476                                   |
| 458.65 | 3298.59                                 | 762.987                                    | 2229.14                                    | -259.409                                   |

**Table S2b** Smoothed molar heat capacities and thermodynamic functions of complex 2.

| T/K    | $C_{p,m}/\text{JK}^{-1}\text{mol}^{-1}$ | $H_T-H_{298.15\text{K}}/\text{kJmol}^{-1}$ | $S_T-S_{298.15\text{K}}/\text{JKmol}^{-1}$ | $G_T-G_{298.15\text{K}}/\text{kJmol}^{-1}$ |
|--------|-----------------------------------------|--------------------------------------------|--------------------------------------------|--------------------------------------------|
| 263.15 | 2309.55                                 | -87.897                                    | -313.07                                    | -5.511                                     |
| 273.15 | 2422.86                                 | -64.229                                    | -224.81                                    | -2.822                                     |
| 283.15 | 2540.15                                 | -39.416                                    | -135.61                                    | -1.019                                     |
| 293.15 | 2654.68                                 | -13.439                                    | -45.45                                     | -0.114                                     |
| 303.15 | 2760.86                                 | 13.704                                     | 45.58                                      | -0.114                                     |
| 306.65 | 2811.80                                 | 774.902                                    | 2586.72                                    | -18.317                                    |
| 316.65 | 3572.36                                 | 806.216                                    | 2687.13                                    | -44.662                                    |
| 326.65 | 2972.05                                 | 50.655                                     | 159.59                                     | -1.477                                     |
| 336.65 | 3082.07                                 | 81.017                                     | 251.14                                     | -3.530                                     |
| 346.65 | 3153.89                                 | 112.189                                    | 342.38                                     | -6.498                                     |
| 356.65 | 3244.94                                 | 144.167                                    | 433.32                                     | -10.376                                    |
| 366.65 | 3345.69                                 | 177.121                                    | 524.44                                     | -15.164                                    |
| 376.65 | 3439.27                                 | 211.056                                    | 615.74                                     | -20.864                                    |
| 386.65 | 3522.86                                 | 245.872                                    | 706.97                                     | -27.477                                    |
| 396.65 | 3605.81                                 | 281.512                                    | 797.97                                     | -35.002                                    |
| 406.65 | 3698.28                                 | 318.022                                    | 888.87                                     | -43.435                                    |
| 416.65 | 3801.88                                 | 355.517                                    | 979.95                                     | -52.779                                    |
| 426.65 | 3909.08                                 | 394.073                                    | 1071.39                                    | -63.035                                    |
| 436.65 | 4012.23                                 | 433.684                                    | 1163.15                                    | -74.207                                    |
| 446.65 | 4114.85                                 | 474.316                                    | 1255.15                                    | -86.298                                    |
| 456.65 | 4228.24                                 | 516.022                                    | 1347.49                                    | -99.310                                    |

**Table S2c** Smoothed molar heat capacities and thermodynamic functions of complex 3.

| T/K    | $C_{p,m}/\text{JK}^{-1}\text{mol}^{-1}$ | $H_T-H_{298.15\text{K}}/\text{kJmol}^{-1}$ | $S_T-S_{298.15\text{K}}/\text{JKmol}^{-1}$ | $G_T-G_{298.15\text{K}}/\text{kJmol}^{-1}$ |
|--------|-----------------------------------------|--------------------------------------------|--------------------------------------------|--------------------------------------------|
| 263.15 | 2066.69                                 | 6679.823                                   | 22557.33                                   | 743.860                                    |
| 273.15 | 2148.53                                 | 6700.895                                   | 22635.92                                   | 517.894                                    |
| 280.15 | 2209.54                                 | -41.668                                    | -144.07                                    | -1.306                                     |
| 290.15 | 2311.12                                 | -19.074                                    | -64.84                                     | -0.261                                     |
| 300.15 | 2468.13                                 | 4.954                                      | 16.56                                      | -0.017                                     |
| 310.15 | 2452.22                                 | 28.959                                     | 95.22                                      | -0.572                                     |
| 320.15 | 2530.78                                 | 53.878                                     | 174.29                                     | -1.919                                     |
| 330.15 | 2600.37                                 | 79.543                                     | 253.22                                     | -4.057                                     |
| 340.15 | 2661.86                                 | 105.859                                    | 331.74                                     | -6.981                                     |
| 350.15 | 2720.76                                 | 132.773                                    | 409.71                                     | -10.689                                    |
| 360.15 | 2780.60                                 | 160.278                                    | 487.16                                     | -15.173                                    |
| 370.15 | 2842.19                                 | 188.391                                    | 564.15                                     | -20.430                                    |
| 380.15 | 2905.05                                 | 217.127                                    | 640.75                                     | -26.454                                    |
| 390.15 | 2968.53                                 | 246.495                                    | 717.00                                     | -33.243                                    |
| 400.15 | 3032.30                                 | 276.499                                    | 792.93                                     | -40.792                                    |
| 410.15 | 3096.15                                 | 307.142                                    | 868.56                                     | -49.100                                    |
| 420.15 | 3159.89                                 | 338.423                                    | 943.91                                     | -58.162                                    |
| 430.15 | 3223.64                                 | 370.340                                    | 1018.99                                    | -67.976                                    |
| 440.15 | 3288.33                                 | 402.899                                    | 1093.81                                    | -78.540                                    |
| 450.15 | 3354.85                                 | 436.114                                    | 1168.42                                    | -89.851                                    |
| 460.15 | 3418.67                                 | 469.990                                    | 1242.85                                    | -101.907                                   |
